# Supplementary material for: Argon Saturation in a Suite of Coupled General Ocean Circulation Biogeochemical Models off Mauretania
Source: Copernicus journal article supplement (doi:10.5194/egusphere-2024-918), 2024-05-03
Supplement: Supplementary file [file egusphere-2024-918-AC2-supplement.pdf]

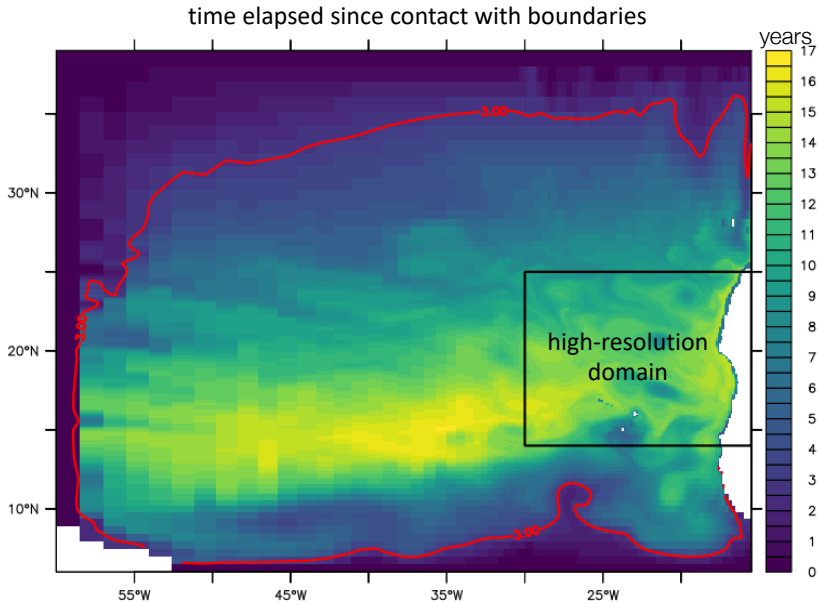

Figure 1: Simulated time elapsed since water parcels have been in contact with the Northern, Southern or Western boundary of the model domain (monthly mean at the end of a 30 year-long integration of configuration “Coarse”). The time elapsed shown is averaged over the 100m to 400m depth interval (surface values are discarded following a suggestion by RC1). The red contour depicts the 3-year isoline indicating that the contoured region is rather undisturbed by boundary effects at the end of a 3 year-long simulation.
